# Supplementary material for: Fibroblast Growth Factor 9 Regulation by MicroRNAs Controls Lung Development and Links DICER1 Loss to the Pathogenesis of Pleuropulmonary Blastoma
Source: PubMed Central journal article supplement (PMC4433140; doi:10.1371/journal.pgen.1005242), 2015-05-15
Supplement: pgen.1005242.s004.pdf [file pgen.1005242.s004.pdf]

S2\_Fig.

*Shh<sup>Cre</sup>,Dicer1<sup>f/+</sup>*

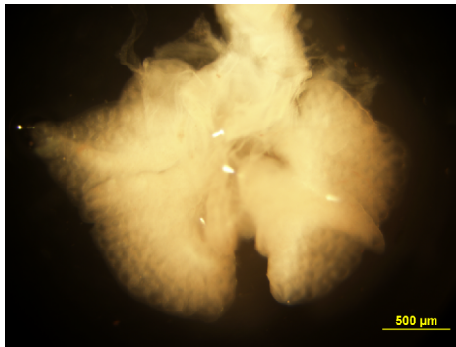

*Shh<sup>Cre</sup>,Dicer1<sup>ff</sup>*

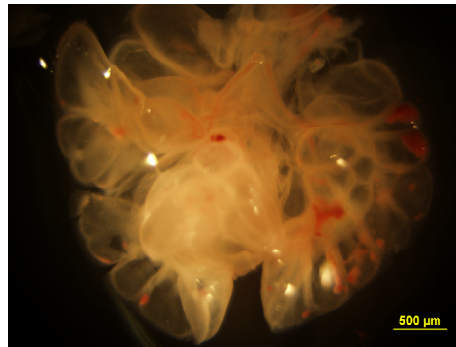

*Shh<sup>Cre</sup>,Dicer1<sup>ff</sup>,Fgf9<sup>ff</sup>*

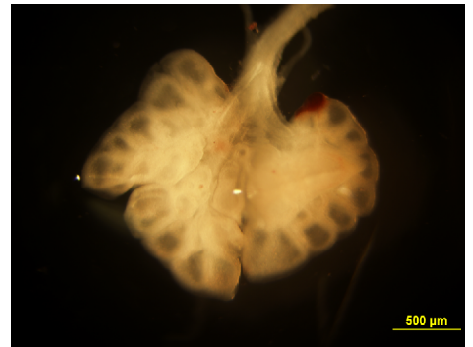

E14.5
