# Supplementary material for: Fibroblast Growth Factor 9 Regulation by MicroRNAs Controls Lung Development and Links DICER1 Loss to the Pathogenesis of Pleuropulmonary Blastoma
Source: PubMed Central journal article supplement (PMC4433140; doi:10.1371/journal.pgen.1005242), 2015-05-15

S4\_Fig.

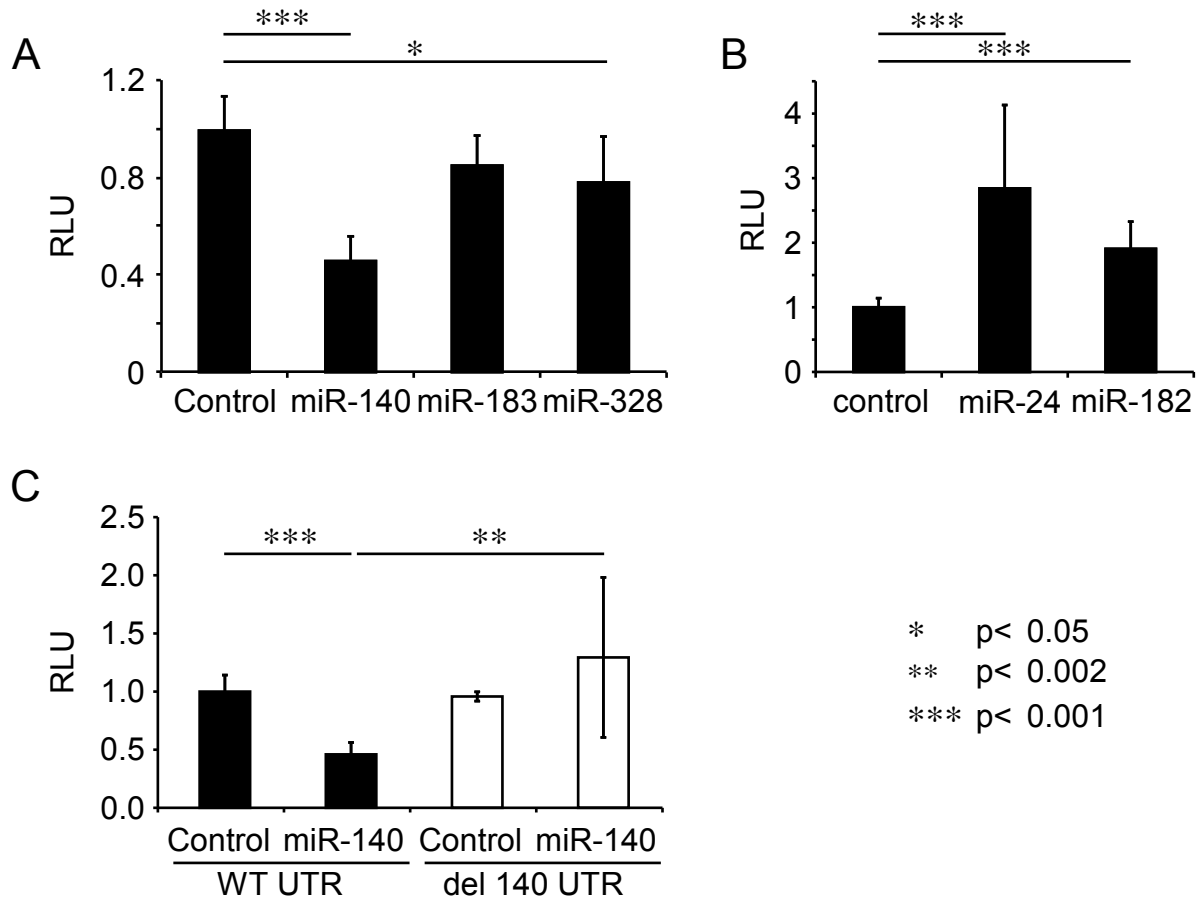

Supplement: pgen.1005242.s006.pdf [file pgen.1005242.s006.pdf]
