# Supplementary material for: Fibroblast Growth Factor 9 Regulation by MicroRNAs Controls Lung Development and Links DICER1 Loss to the Pathogenesis of Pleuropulmonary Blastoma
Source: PLoS Genet. 2015 May 15;11(5):e1005242. doi: 10.1371/journal.pgen.1005242 (PMC4433140; doi:10.1371/journal.pgen.1005242)
Supplement: S3 Fig — (A) Pairwise alignment of human and mouse FGF9 3' UTR near the miRNA 140-5p target site (underlined). (B) Pairwise alignment of human and mouse FGF9 3' UTR near the miRNA 328-3p target site (underlined). (C) miR-140-5p target site in the mouse Fgf9 3’ UTR. (D) miR-140-5p target site in the human FGF9 3’ UTR. (E) miR-328-3p target site in the mouse Fgf9 3’ UTR. (F) miR-328-3p target site in the human FGF9 3’ UTR. (PDF) [file pgen.1005242.s005.pdf]

**Green**= anti-miR tiny LNA sequence
